# Supplementary material for: NEUROD1 Is Required for the Early α and β Endocrine Differentiation in the Pancreas
Source: MDPI journal article supplement (doi:10.3390/ijms22136713), 2021-06-23
Supplement: s1 [file s1]

# Supplementary material

Table S1: Quantification of apoptotic cells in the E17.5 pancreas

| 2592_control |            |                  | 2595_Neurod1CKO |          |            |                  |
|--------------|------------|------------------|-----------------|----------|------------|------------------|
| Section#     | INS+ cells | other cell types |                 | Section# | INS+ cells | other cell types |
| 1            | 0          | 1                |                 | 1        | 0          | 0                |
| 2            | 0          | 0                |                 | 2        | 0          | 0                |
| 3            | 0          | 0                |                 | 3        | 0          | 0                |
| 4            | 0          | 0                |                 | 4        | 0          | 0                |
| 5            | 0          | 0                |                 | 5        | 1          | 0                |
| 6            | 0          | 0                |                 | 6        | 0          | 0                |
| 2591_control |            |                  | 2594_Neurod1CKO |          |            |                  |
| Section#     | INS+ cells | other cell types |                 | Section# | INS+ cells | other cell types |
| 1            | 0          | 0                |                 | 1        | 0          | 0                |
| 2            | 0          | 4                |                 | 2        | 0          | 0                |
| 3            | 0          | 1                |                 | 3        | 0          | 0                |
| 4            | 1          | 0                |                 | 4        | 0          | 0                |
| 5            | 0          | 0                |                 | 5        | 0          | 0                |
| 6            | 0          | 0                |                 | 6        | 0          | 0                |
| 2589_control |            |                  | 2590_Neurod1CKO |          |            |                  |
| Section#     | INS+ cells | other cell types |                 | Section# | INS+ cells | other cell types |
| 1            | 0          | 0                |                 | 1        | 1          | 0                |
| 2            | 0          | 2                |                 | 2        | 0          | 3                |
| 3            | 0          | 0                |                 | 3        | 0          | 0                |
| 4            | 0          | 0                |                 | 4        | 0          | 0                |
| 5            | 0          | 0                |                 | 5        | 0          | 2                |
| 6            | 0          | 0                |                 | 6        | 0          | 0                |

\* Parafin sections from the E17.5 control and *Neurod1CKO* pancreas immunostained for insulin and apoptotic cells (TUNEL) were evaluated. TUNEL positive cells were manually quantified.

Table S2. Primer sequences for qPCR

|                  |                             |
|------------------|-----------------------------|
| <i>Arx_F</i>     | TTTCTAGGAGCAGCGGTGT         |
| <i>Arx_R</i>     | GGGCCATAGTGGAAGAGC          |
| <i>Pdx1_F</i>    | CCCCAGTTTACAAGCTCGCT        |
| <i>Pdx1_R</i>    | CTCGGTTCCATTCGGGAAAGG       |
| <i>Pax6_F</i>    | GTTGTGTGAGTAAAATTCTGGGC     |
| <i>Pax6_R</i>    | GAGTCGCCACTCTTGCTTA         |
| <i>Neurod1_F</i> | ATGACCAAATCATACAGCGAGAG     |
| <i>Neurod1_R</i> | TCTGCCTCGTGTTCCTCGT         |
| <i>MafA_F</i>    | CTCCAGAGCCAGGTGGAG          |
| <i>MafA_R</i>    | GTACAGGTCCCGCTCCTTG         |
| <i>MafB_F</i>    | GCAGGTATAAACGCGTCCAG        |
| <i>MafB_R</i>    | TGAATGAGCTGCGTCTTCTC        |
| <i>Neurog3_F</i> | AGTGCTCAGTTCCAATTCCAC       |
| <i>Neurog3_R</i> | CGGCTTCTTCGCTTTTGCTG        |
| <i>Pou3f4_F</i>  | CTGCCTCGAATCCCTACAGC        |
| <i>Pou3f4_R</i>  | CTGCAAGTAGTCACTTTGGAGAA     |
| <i>Ppy_F</i>     | CAGGCGACTATGCGACACC         |
| <i>Ppy_R</i>     | CAGGGAATCAAGCCAAGTGG        |
| <i>Sst_F</i>     | ACCGGGAAACAGGAAGTGG         |
| <i>Sst_R</i>     | TTGCTGGGTTCGAGTTGGC         |
| <i>Gcg_F</i>     | CAGAAGAAGTCGCCATTGCC        |
| <i>Gcg_R</i>     | AAGTCCCTGGTGGCAAGATT        |
| <i>Ghrl_F</i>    | CCAGAGGACAGAGGACAAGC        |
| <i>Ghrl_R</i>    | ACATCGAAGGGAGCATTGAA        |
| <i>Ins1_F</i>    | GACCAGCTATAATCAGAGACCATC    |
| <i>Ins1_R</i>    | GTAGGAAGTGCACCAACAGG        |
| <i>Ins2_F</i>    | GGCTTCTTCTACACACCCAT        |
| <i>Ins2_R</i>    | CCAAGGTCTGAAGGTCACCT        |
| <i>Nkx2.2_F</i>  | AAGCATTTCAAACCGACGGA        |
| <i>Nkx2.2_R</i>  | CCTCAAATCCACAGATGACCAGA     |
| <i>Insm1_F</i>   | CTGGCGGCGTATCCGAATC         |
| <i>Insm1_R</i>   | CCTGGCGACGGAAGTCTT          |
| <i>Pax4_F</i>    | AGGGGACTCTTTGTGAATGG        |
| <i>Pax4_R</i>    | ACCTGTGCGGTAGTAGCGT         |
| <i>Hprt1_F</i>   | GTGGCCCTCTGTGTGCTC          |
| <i>Hprt1_R</i>   | TCTACAGTCATAGGAATGGATCTATCA |
